# Supplementary material
Source: publisher figshare collection journal article supplement (https://gsajournals.figshare.com/ndownloader/files/25491401)
Supplement: Supplementary file 1 [file 25491401]

**Table S2: mutants with no effect on NUN bodies**

| **gene** | **human ortholog** | **strain** | **genotype** | **effect on NUN bodies** |
| --- | --- | --- | --- | --- |
| *fib-1** | FBL | VC1927 | *fib-1(ok2527) V/nT1 [qIs51] (IV;V)* | none |
| *hpl-1 & hpl-2* | HP1α, β and γ | OH14478 | *hpl-2(tm1489) III; hpl-1(n4317) X; ntIs1; otIs348* | none |
| *mes-2** | EZH1-2 | SS186 | *mes-2(bn11) unc-4(e120)/mnC1 [dpy-10(e128) unc-52(e444)] II* | none |
| *met-2 & set-25* | SETDB1-2, SETBP1 | OH14481 | *met-2(n4256) set-25(n5021); otIs348; ntIs1* | none |
| *nono-1** | NONO, PSPC1, SFPQ | VC1635 | *nono-1(gk1206) III/hT2 [bli-4(e937) let-?(q782) qIs48] (I;III)* | none |
| *rsp-4* | SRSF2 |  | *rsp-4(tm837) II* | none |
| *set-11* | EHMT2, SUV39H1 | VC1219 | *set-11(ok1691) II* | none |
| *smn-1** | SMN1-2 | LM99 | *smn-1(ok355) I/hT2 [bli-4(e937) qIs48] (I;III)* | none |
| *smo-1** | SUMO1-3 | VC186 | *smo-1(ok359)/szT1 [lon-2(e678)] I; +/szT1 X* | none |
| *ubc-18* | UBE2L3 | DLM15 | *ubc-18(tm5426) III* | none |

*possible maternal perdurance
